# Supplementary material for: High quality N-polar GaN films grown with varied V/III ratios by metal–organic vapor phase epitaxy
Source: Royal Society of Chemistry journal article supplement (doi:10.1039/d0ra07856e), 2020-01-01
Supplement: d0ra07856e1.pdf [file d0ra07856e1.pdf]

## Supplement information

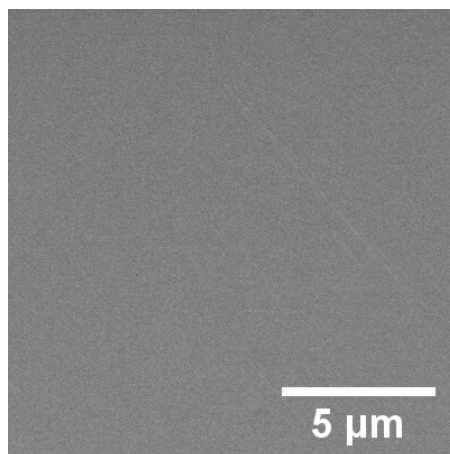

*Fig. S1 Scanning electron microscopy top-view image of the as-grown surface of Sample A.*

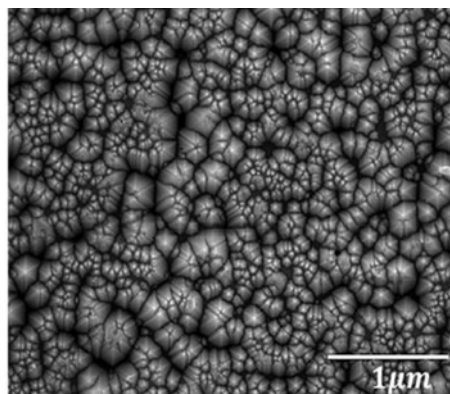

*Fig. S2 Scanning electron microscopy top-view image of the KOH-etched surface of Sample A.*
